# Supplementary material for: The evolution of competitive ability for essential resources
Source: PubMed Central journal article supplement (PMC7133530; doi:10.1098/rstb.2019.0247), 2020-03-23
Supplement: rstb20190247supp3.pdf [file rstb20190247supp3.pdf]

# Electronic Supplementary Materials: Appendix C

## Supplementary Tables

### Tables S1-S7

#### Evolution of competitive ability for essential resources

Joey R. Bernhardt<sup>1\*</sup>, Pavel Kratina<sup>2</sup>, Aaron L. Pereira<sup>1</sup>, Manu Tamminen<sup>3</sup>, Mridul K. Thomas<sup>4</sup>, Anita Narwani<sup>1</sup>

<sup>1</sup>Aquatic Ecology Department, Eawag, Überlandstrasse 133, CH-8600 Dübendorf, Switzerland

<sup>2</sup>School of Biological and Chemical Sciences, Queen Mary University of London, Mile End Road, London E1 4NS, United Kingdom.

<sup>3</sup>Department of Biology, University of Turku, Natura, University Hill, 20014 Turku, Finland

<sup>4</sup>Centre for Ocean Life, DTU Aqua, Technical University of Denmark, Kongens Lyngby, Denmark

\*Correspondence to: [joey.bernhardt@biodiversity.ubc.ca](mailto:joey.bernhardt@biodiversity.ubc.ca)

|                                   | Change in $I^*$     |                     |                     |
|-----------------------------------|---------------------|---------------------|---------------------|
|                                   | (1)                 | (2)                 | (3)                 |
| <b>Change in salt tol</b>         | -0.21 (-0.57, 0.15) |                     |                     |
| <b>Change in <math>N^*</math></b> |                     | 0.38** (0.07, 0.68) |                     |
| <b>Change in <math>P^*</math></b> |                     |                     | 0.34* (-0.03, 0.72) |
| <b>Change in size</b>             | 0.11 (-0.25, 0.47)  | 0.04 (-0.30, 0.37)  | 0.10 (-0.24, 0.44)  |
| <b>Anc 3</b>                      | -0.59 (-1.60, 0.41) | -0.66 (-1.58, 0.27) | -0.44 (-1.43, 0.55) |
| <b>Anc 4</b>                      | -0.35 (-1.30, 0.60) | 0.11 (-0.84, 1.07)  | -0.29 (-1.20, 0.63) |
| <b>Anc 5</b>                      | 1.23** (0.09, 2.36) | 1.35** (0.31, 2.39) | 1.30** (0.21, 2.39) |
| <b>cc1690</b>                     | -0.77 (-1.81, 0.27) | -0.64 (-1.59, 0.31) | -0.75 (-1.75, 0.25) |
| <b>Constant</b>                   | 0.07 (-0.69, 0.83)  | -0.21 (-0.88, 0.47) | 0.11 (-0.61, 0.83)  |
| Observations                      | 32                  | 32                  | 32                  |
| $R^2$                             | 0.46                | 0.54                | 0.49                |
| Adjusted $R^2$                    | 0.33                | 0.43                | 0.37                |

Note: \* $p < 0.1$ ; \*\* $p < 0.05$ ; \*\*\* $p < 0.01$ ; (95% CI)

**Table S1.** Multiple regression fits of change in  $I^*$  of descendant populations relative to their ancestors, as a function of changes in cell biovolume (size; when growing in light limiting conditions (ESM Figure S9) and ancestry, as well as changes in salt tolerance (model 1), changes in  $N^*$  (model 2), changes in  $P^*$  (model 3).

|                                   | Change in $P^*$     |                     |                     |
|-----------------------------------|---------------------|---------------------|---------------------|
|                                   | (1)                 | (2)                 | (3)                 |
| <b>Change in salt tol</b>         | -0.13 (-0.49, 0.24) |                     |                     |
| <b>Change in <math>I^*</math></b> |                     | 0.38* (0.001, 0.75) |                     |
| <b>Change in <math>N^*</math></b> |                     |                     | 0.13 (-0.20, 0.45)  |
| <b>Change in size</b>             | 0.05 (-0.33, 0.43)  | -0.08 (-0.45, 0.29) | 0.01 (-0.37, 0.39)  |
| <b>Anc 3</b>                      | -0.58 (-1.60, 0.44) | -0.41 (-1.39, 0.57) | -0.63 (-1.64, 0.39) |
| <b>Anc 4</b>                      | -0.18 (-1.17, 0.81) | -0.12 (-1.05, 0.81) | -0.05 (-1.10, 1.01) |
| <b>Anc 5</b>                      | -0.23 (-1.45, 1.00) | -0.87 (-2.14, 0.41) | -0.23 (-1.44, 0.99) |
| <b>cc1690</b>                     | -0.05 (-1.01, 0.92) | 0.32 (-0.65, 1.28)  | 0.04 (-0.94, 1.01)  |
| <b>Constant</b>                   | -0.39 (-1.14, 0.36) | -0.40 (-1.09, 0.28) | -0.51 (-1.25, 0.23) |
| Observations                      | 32                  | 32                  | 32                  |
| $R^2$                             | 0.10                | 0.20                | 0.10                |
| Adjusted $R^2$                    | -0.12               | 0.01                | -0.12               |

Note: \* $p < 0.1$ ; \*\* $p < 0.05$ ; \*\*\* $p < 0.01$ ; (95% CI)

**Table S2.** Multiple regression fits of change in  $P^*$  of descendant populations relative to their ancestors, as a function of changes in cell biovolume (size; when growing in phosphorus limited conditions (ESM Figure S7), ancestry and changes in salt tolerance (model 1), changes in  $I^*$  (model 2), changes in  $N^*$  (model 3).

|                                   | Change in $N^*$                                         |                        |                        |
|-----------------------------------|---------------------------------------------------------|------------------------|------------------------|
|                                   | (1)                                                     | (2)                    | (3)                    |
| <b>Change in salt tol</b>         | -0.15 (-0.60, 0.30)                                     |                        |                        |
| <b>Change in <math>I^*</math></b> |                                                         | 0.56** (0.14, 0.97)    |                        |
| <b>Change in <math>P^*</math></b> |                                                         |                        | 0.20 (-0.28, 0.68)     |
| <b>Change in size</b>             | 0.004 (-0.45, 0.46)                                     | -0.09 (-0.48, 0.31)    | -0.08 (-0.52, 0.37)    |
| <b>Anc 3</b>                      | -0.06 (-1.28, 1.15)                                     | 0.30 (-0.82, 1.42)     | 0.03 (-1.21, 1.27)     |
| <b>Anc 4</b>                      | -1.28** (-2.50, -0.06)                                  | -1.15** (-2.23, -0.06) | -1.31** (-2.51, -0.10) |
| <b>Anc 5</b>                      | -0.68 (-1.90, 0.53)                                     | -1.25** (-2.41, -0.08) | -0.61 (-1.83, 0.62)    |
| <b>cc1690</b>                     | -0.53 (-1.70, 0.63)                                     | -0.02 (-1.12, 1.09)    | -0.50 (-1.66, 0.66)    |
| <b>Constant</b>                   | 0.61 (-0.32, 1.54)                                      | 0.48 (-0.31, 1.26)     | 0.57 (-0.31, 1.46)     |
| Observations                      | 32                                                      | 32                     | 32                     |
| $R^2$                             | 0.21                                                    | 0.37                   | 0.22                   |
| Adjusted $R^2$                    | 0.02                                                    | 0.22                   | 0.03                   |
| Note:                             | * $p < 0.1$ ; ** $p < 0.05$ ; *** $p < 0.01$ ; (95% CI) |                        |                        |

**Table S3.** Multiple regression fits of change in  $N^*$  of descendant populations relative to their ancestors, as a function of changes in cell biovolume (size; when growing in nitrogen limited conditions (ESM Figure S8), ancestry, and changes in salt tolerance (model 1), changes in  $I^*$  (model 2), changes in  $P^*$  (model 3).

---

**Competitive ability for nitrogen, CN (1/N\*)**

---

|                               |                      |
|-------------------------------|----------------------|
| <b>CP</b>                     | 0.36** (0.02, 0.70)  |
| <b>CI</b>                     | 0.08 (-0.26, 0.42)   |
| <b>Biovolume</b>              | 0.02 (-0.32, 0.36)   |
| <b><math>\mu_{max}</math></b> | -0.37* (-0.74, 0.01) |
| <b>Anc 3</b>                  | -0.10 (-1.12, 0.92)  |
| <b>Anc 4</b>                  | -0.73 (-1.68, 0.22)  |
| <b>Anc 5</b>                  | -0.30 (-1.29, 0.70)  |
| <b>cc1690</b>                 | -0.20 (-1.17, 0.77)  |
| <b>Constant</b>               | 0.28 (-0.42, 0.97)   |

---

|                |      |
|----------------|------|
| Observations   | 37   |
| $R^2$          | 0.37 |
| Adjusted $R^2$ | 0.18 |

---

Note: \* $p < 0.1$ ; \*\* $p < 0.05$ ; \*\*\* $p < 0.01$ ; (95% CI)

**Table S4.** Multiple regression fits of competitive ability for nitrogen (CN), as a function of competitive ability for phosphorus (CP), competitive ability for light (CI), cell biovolume when growing in nitrogen limited conditions (ESM Figure S8) and  $u_{max}$  (derived from fits of Monod curve over a gradient of nitrogen supply; Figure 2B).

| <b>Competitive ability for light, CI (1/I*)</b> |                        |
|-------------------------------------------------|------------------------|
| <b>CP</b>                                       | -0.24 (-0.64, 0.16)    |
| <b>CN</b>                                       | -0.14 (-0.53, 0.26)    |
| <b>Biovolume</b>                                | -0.50** (-0.87, -0.12) |
| <b><math>\mu_{max}</math></b>                   | -0.15 (-0.52, 0.22)    |
| <b>Anc 3</b>                                    | -0.08 (-1.27, 1.11)    |
| <b>Anc 4</b>                                    | 0.32 (-0.83, 1.47)     |
| <b>Anc 5</b>                                    | -0.01 (-1.30, 1.27)    |
| <b>cc1690</b>                                   | -0.33 (-1.47, 0.82)    |
| <b>Constant</b>                                 | 0.12 (-0.74, 0.99)     |
| Observations                                    | 32                     |
| $R^2$                                           | 0.34                   |
| Adjusted $R^2$                                  | 0.11                   |

Note: \* $p < 0.1$ ; \*\* $p < 0.05$ ; \*\*\* $p < 0.01$ ; (95% CI)

**Table S5.** Multiple regression fits of competitive ability for light (CI), as a function of competitive ability for nitrogen (CN), competitive ability for light (CI), cell biovolume when growing in light limited conditions (ESM Figure S9) and  $\mu_{max}$  (derived from fits of Monod curve over a gradient of light availability; Figure 2C).

---

**Competitive ability for phosphorus, CP (1/P\*)**

---

|                               |                        |
|-------------------------------|------------------------|
| <b>CN</b>                     | 0.54*** (0.24, 0.84)   |
| <b>CI</b>                     | 0.07 (-0.25, 0.38)     |
| <b>Biovolume</b>              | 0.28 (-0.05, 0.61)     |
| <b><math>\mu_{max}</math></b> | -0.35** (-0.64, -0.07) |
| <b>Anc 3</b>                  | -0.28 (-1.17, 0.60)    |
| <b>Anc 4</b>                  | 0.46 (-0.43, 1.35)     |
| <b>Anc 5</b>                  | -0.23 (-1.13, 0.67)    |
| <b>cc1690</b>                 | -0.32 (-1.21, 0.56)    |
| <b>Constant</b>               | 0.07 (-0.57, 0.70)     |

---

|                         |      |
|-------------------------|------|
| Observations            | 37   |
| R <sup>2</sup>          | 0.48 |
| Adjusted R <sup>2</sup> | 0.33 |

---

Note: \* $p < 0.1$ ; \*\* $p < 0.05$ ; \*\*\* $p < 0.01$ ; (95% CI)

**Table S6.** Multiple regression fits of competitive ability for phosphorus (CP), as a function of competitive ability for nitrogen (CN), competitive ability for light (CI), cell biovolume when growing in phosphorus limited conditions (ESM Figure S7) and  $u_{max}$  (derived from fits of Monod curve over a gradient of phosphorus supply; Figure 2A).

|      | B   | BS  | C   | L   | N   | P   | S   |
|------|-----|-----|-----|-----|-----|-----|-----|
| Anc2 | 484 | 473 | NA  | 473 | 476 | 475 | 436 |
| Anc3 | 450 | 415 | NA  | 396 | 419 | 487 | 433 |
| Anc4 | 530 | 500 | 468 | 492 | 513 | 530 | 508 |
| Anc5 | 563 | NA  | 582 | 533 | 537 | 563 | 569 |

**Table S7.** Number of variable SNPs between the ancestors and descendants from different selection environments: C: COMBO, L: light-limited, P: P-limited, N: N-limited, B: biotically depleted media, S: high salt, BS: biotically depleted and high salt.
